# Supplementary material for: Identification of VEGFs-related gene signature for predicting microangiogenesis and hepatocellular carcinoma prognosis
Source: publisher site journal article supplement (doi:10.18632/aging.205931), 2024-06-13
Supplement: Supplementary file [file aging-v16-205931-supplementary-material-SD3.pdf]

**Supplementary Table 2. 4 risk model genes and their related coefficients.**

| <b>Id</b> | <b>Coef</b>        |
|-----------|--------------------|
| NODAL     | -0.247060124481458 |
| NDRG2     | -0.272265942986441 |
| CCR2      | -0.213931600877348 |
| ADAMTS3   | 0.115299796358193  |

**Supplementary Table 3. PCR primers sequences.**

|              |         |                              |
|--------------|---------|------------------------------|
| ADAMTS3      | Forward | 5'ACTGCACCAAAACCTGTGGA 3'    |
|              | Reverse | 5'CCGACTCAGGCTTTTCACCA 3'    |
| CCR2         | Forward | 5'AGAGGTCTCGGTTGGGTTGT 3'    |
|              | Reverse | 5'ATCATAACGTTCTGGGCACC 3'    |
| NDRG2        | Forward | 5'TACGTCGGCCGTGTCTAT3'       |
|              | Reverse | 5'GAACTGTGATCCGTGTAGG3'      |
| NODAL        | Forward | 5'CTGGGAGAACAGGGTACGATAACC5' |
|              | Reverse | 5'CGTAGAAGAGGAGGGTCGGG5'     |
| β-Actin gene | Forward | 5'TTCCTGGGCATGGAGTCCT3'      |
|              | Reverse | 5'AGGAGGAGCAATGATCTTGATC3'   |
