# Supplementary material for: Identification of VEGFs-related gene signature for predicting microangiogenesis and hepatocellular carcinoma prognosis
Source: Aging (Albany NY). 2024 Jun 13;16(12):10321–47. doi: 10.18632/aging.205931 (PMC11236318; doi:10.18632/aging.205931)
Supplement: Supplementary Table 1 [file aging-16-205931-s002.xlsx]

## Sheet: VEGF_DEGs_diff
Supplementary Table 1. The upregulated and downregulated VEGF production-related genes (VPRGs) and their analogous logFC values.
id	logFC	AveExpr	t	P.Value	adj.P.Val	B
CCBE1	-1.71626	6.29932	-9.73773	6.95513e-21	5.61656e-20	35.7115
IL1B	-1.23963	6.31404	-7.81257	2.56619e-14	1.28256e-13	20.7649
NOX1	-1.00048	5.01476	-8.08059	3.63654e-15	1.93773e-14	22.6913
C5AR1	-0.983388	8.23328	-7.13205	2.89656e-12	1.22571e-11	16.114
AQP4	-0.898423	5.54257	-4.96004	9.2213e-07	2.32498e-06	3.75402
CXCL17	-0.838669	3.14462	3.8213	0.000146788	0.000290724	-1.09088
GATA4	-0.795558	9.4226	-7.70915	5.37945e-14	2.62049e-13	20.0356
IL6	-0.755769	5.6028	-3.02893	0.00256115	0.0043084	-3.75429
TNF	-0.7159	5.40571	-5.86672	7.39934e-09	2.32421e-08	8.43427
PTGS2	-0.714076	6.48785	-4.15434	3.74311e-05	7.96552e-05	0.203822
NDRG2	-0.708725	11.5593	-5.86611	7.42518e-09	2.33189e-08	8.43087
C3AR1	-0.680004	7.66867	-5.16053	3.36589e-07	8.90864e-07	4.72752
ADORA2B	-0.644181	5.43095	-4.33258	1.73123e-05	3.81765e-05	0.938646
CCR2	-0.585534	6.07385	-3.85061	0.000130664	0.00026065	-0.981057
HPSE	-0.648966	6.35447	-5.1943	2.83097e-07	7.55431e-07	4.89495
SULF2	-0.733728	7.47667	2.18296	0.0294311	0.0421213	-5.93559
ATF4	0.825886	12.7894	2.51651	0.0121155	0.018474	-5.15825
ARNT	0.859501	10.3237	3.06488	0.00227675	0.00385914	-3.64635
BRCA1	0.673158	6.86959	2.65494	0.00814571	0.0127613	-4.80393
ADAMTS3	0.993405	17.2443	2.88641	0.0040388	0.00662547	-4.17014
IL6R	0.734425	10.9324	3.59573	0.000350476	0.000662497	-1.90928
NODAL	1.72339	4.3616	12.1616	1.56192e-30	2.25466e-29	57.7684
